# Supplementary material
Source: publisher figshare collection journal article supplement (https://acs.figshare.com/ndownloader/files/10975583)
Supplement: Supplementary file 1 [file 10975583]

## Supporting Information

### **Promising Photocatalysts for Water Splitting in BeN<sub>2</sub> and MgN<sub>2</sub> Monolayers**

Yining Wei, Yandong Ma<sup>\*</sup>, Wei Wei, Mengmeng Li, Baibiao Huang, Ying  
Dai<sup>\*</sup>

School of physics, State Key Laboratory of Crystal Materials, Shandong University, 250100 Jinan,  
PR China

Corresponding authors: [yandong.ma@sdu.edu.cn](mailto:yandong.ma@sdu.edu.cn) (Y.M.); [daiy60@sdu.edu.cn](mailto:daiy60@sdu.edu.cn) (Y.D.)

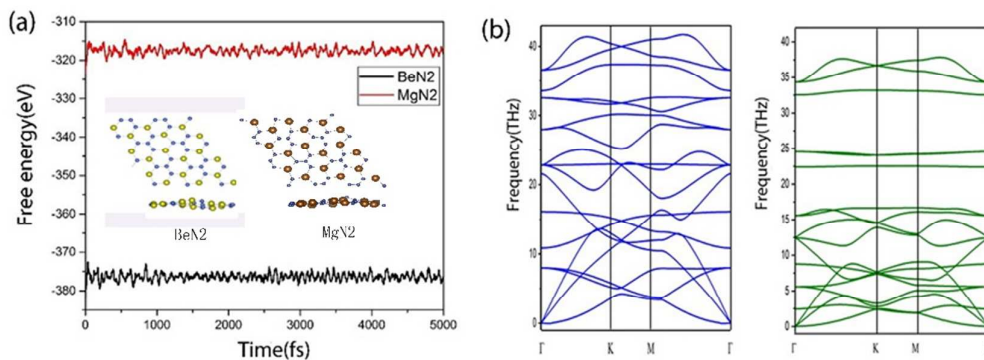

**Fig. S1** (a) Variation of free energy during AIMD simulation at 800 K for BeN<sub>2</sub> and MgN<sub>2</sub> monolayers. (b) Phonon dispersion curves of BeN<sub>2</sub> (left) and MgN<sub>2</sub> (right) monolayers.

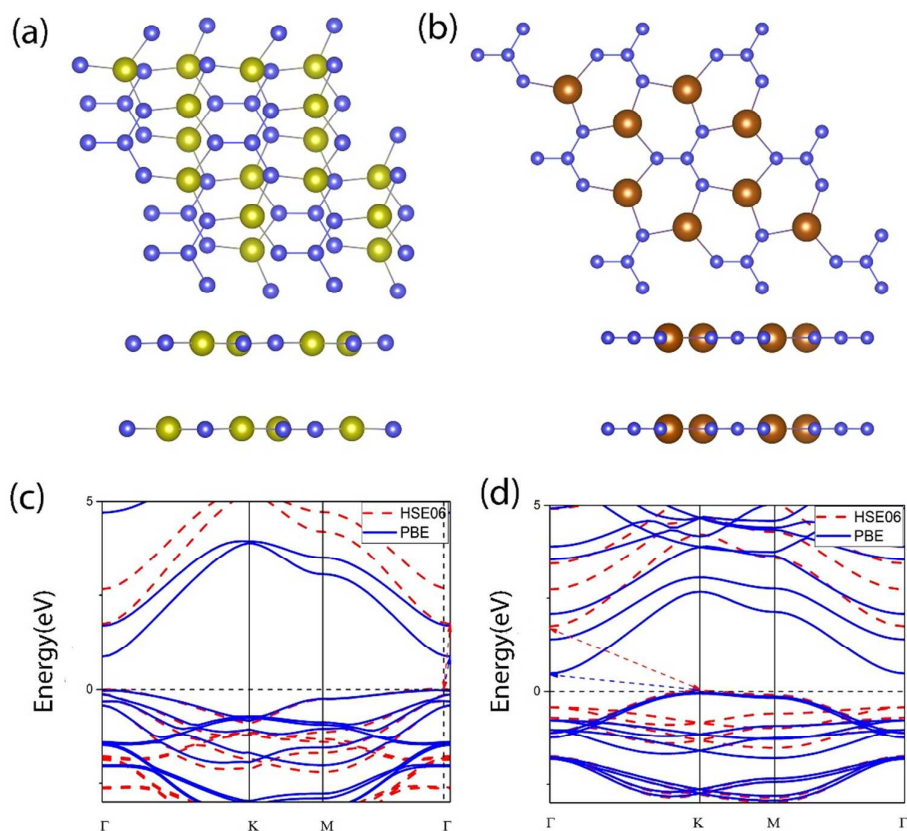

**Fig. S2** (a) (b) the most stable configure after optimization for BeN<sub>2</sub> and MgN<sub>2</sub> double layers. (c) (d) the band structure of BeN<sub>2</sub> and MgN<sub>2</sub> double layers.

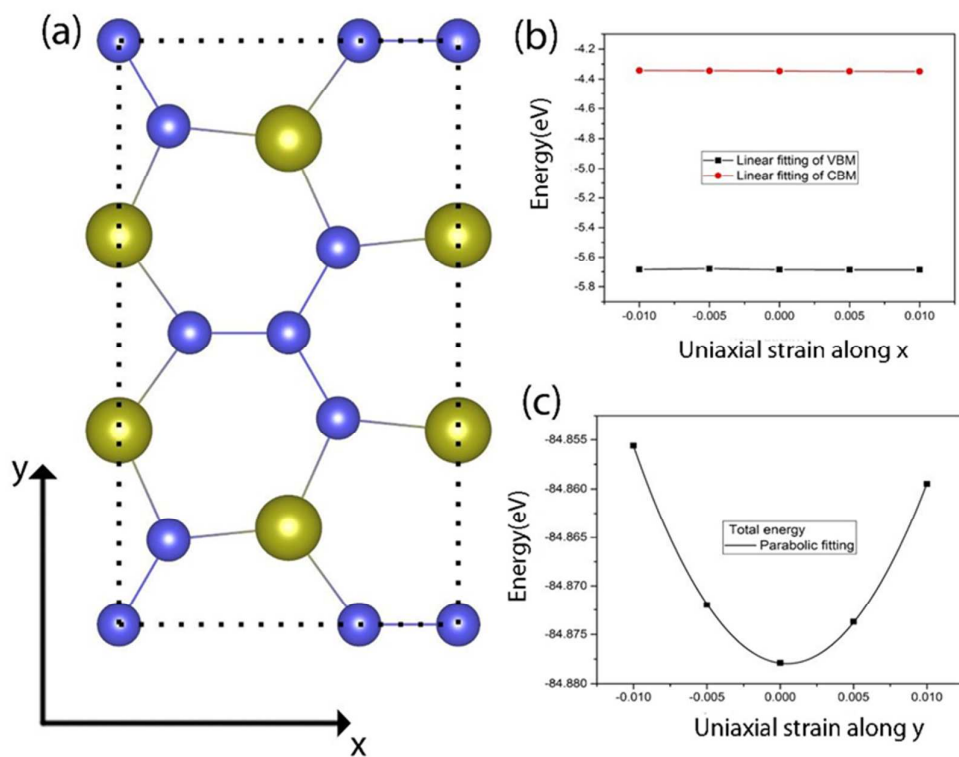

**Fig. S3** (a) Rectangle unit cell of BeN<sub>2</sub> and MgN<sub>2</sub> monolayers. (b) CBM and VBM of BeN<sub>2</sub> monolayers along x direction as a function of deformation proportion. The solid line is a quadratic fitting to the data. (c) The energy of BeN<sub>2</sub> monolayers as a function of the uniaxial strain along x directions.
